# Supplementary material for: Protein-ligand dissociation rate constant from all-atom simulation
Source: Research Square preprint supplement (doi:10.21203/rs.3.rs-816562/v1), 2021-08-26
Supplement: Supplementary file 1 [file de962bbc9254ff784db47cf0.pdf]

# Protein-ligand dissociation rate constant from all-atom simulation

Supplementary information

## MOLECULAR DYNAMICS SIMULATION DETAILS

Molecular dynamics simulations were performed using GROMACS 2020.1 package with implemented  $\tau$ -RAMD method [1]. CHARMM36 force field [2] was chosen for the protein and SwissParam server [3] was used to generate a consistent topology file for the ligand. The system was placed in dodecahedral box at a distance of 1 nm from the edges, solvated with TIP3P water molecules.  $\text{Na}^+$  and  $\text{Cl}^-$  ions were added at physiological concentration of 150 mM. After that, the energy of the system was minimized using steepest descent method and the complex was equilibrated consecutively in  $NVT$  and  $NPT$  ensembles for 100 ps at 300 K and 1 bar with velocity rescaling thermostat and Berendsen barostat. The system was then subjected to 230 ns of MD simulation with velocity rescaling thermostat and Parrinello-Rahman barostat in order to achieve a stable starting structure (RMSD reached the value of 0.25 nm) for further  $\tau$ -RAMD calculations. The time step was equal to 2 fs.

- 
- [1] D. B. Kokh, B. Doser, S. Richter, F. Ormersbach, X. Cheng, and R. C. Wade, A workflow for exploring ligand dissociation from a macromolecule: Efficient random acceleration molecular dynamics simulation and interaction fingerprint analysis of ligand trajectories, *The Journal of Chemical Physics* **153**, 125102 (2020).
- [2] A. D. MacKerell Jr, D. Bashford, M. Bellott, R. L. Dunbrack Jr, J. D. Evanseck, M. J. Field, S. Fischer, J. Gao, H. Guo, S. Ha, *et al.*, All-atom empirical potential for molecular modeling and dynamics studies of proteins, *The journal of physical chemistry B* **102**, 3586 (1998).
- [3] V. Zoete, M. A. Cuendet, A. Grosdidier, and O. Michielin, Swissparam: a fast force field generation tool for small organic molecules, *Journal of computational chemistry* **32**, 2359 (2011).

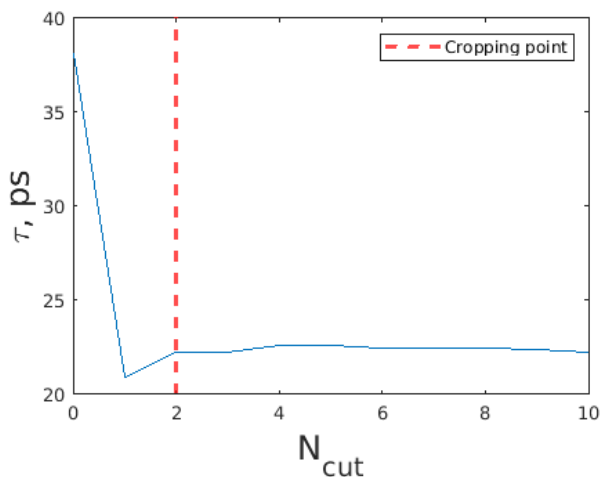

Figure S1. Illustration of how the slope of the exponential regime ( $\tau^{-1}$ ) in semi-logarithmic scale can change depending on the number of the values cut off from the end ( $N_{cut}$ ) for force  $F = 550$  kJ/(nm  $\cdot$  mol). The last point in the data, when  $N(t) = 1$ , forms a long horizontal plateau which significantly increases  $\tau$ . After  $N_{cut} = 2$ ,  $\tau$  stabilizes and cropping of the 2 points ensures reliability of the fitting.

(a)  $F = 250 \text{ kJ}/(\text{nm} \cdot \text{mol})$ 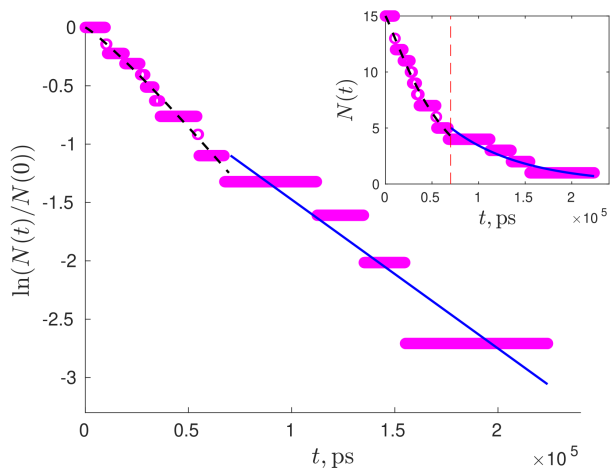(b)  $F = 300 \text{ kJ}/(\text{nm} \cdot \text{mol})$ 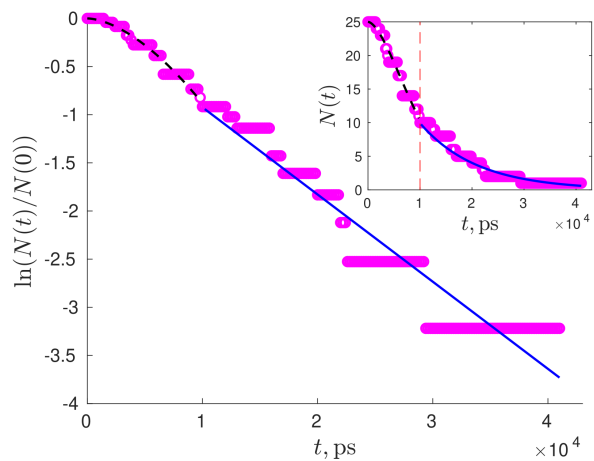(c)  $F = 350 \text{ kJ}/(\text{nm} \cdot \text{mol})$ 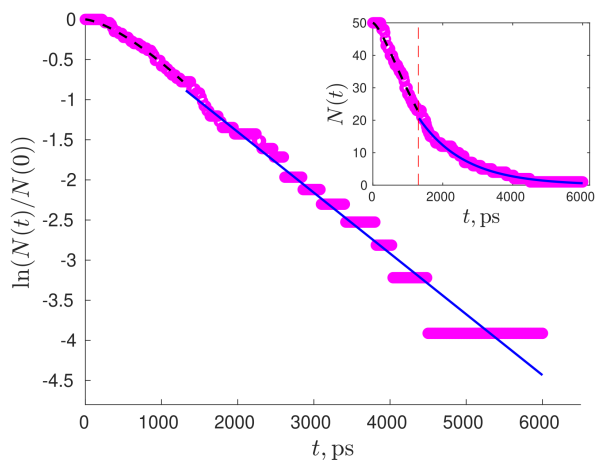(d)  $F = 400 \text{ kJ}/(\text{nm} \cdot \text{mol})$ 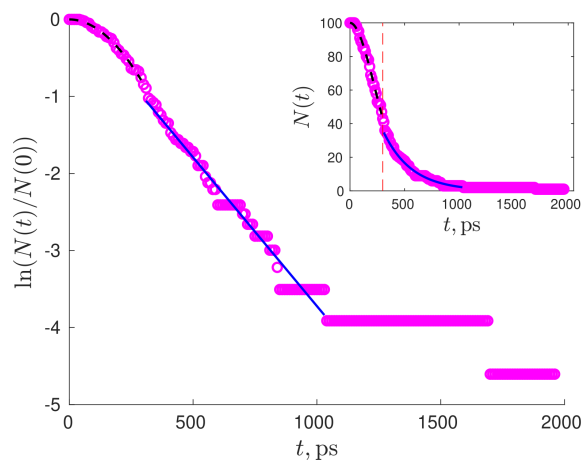

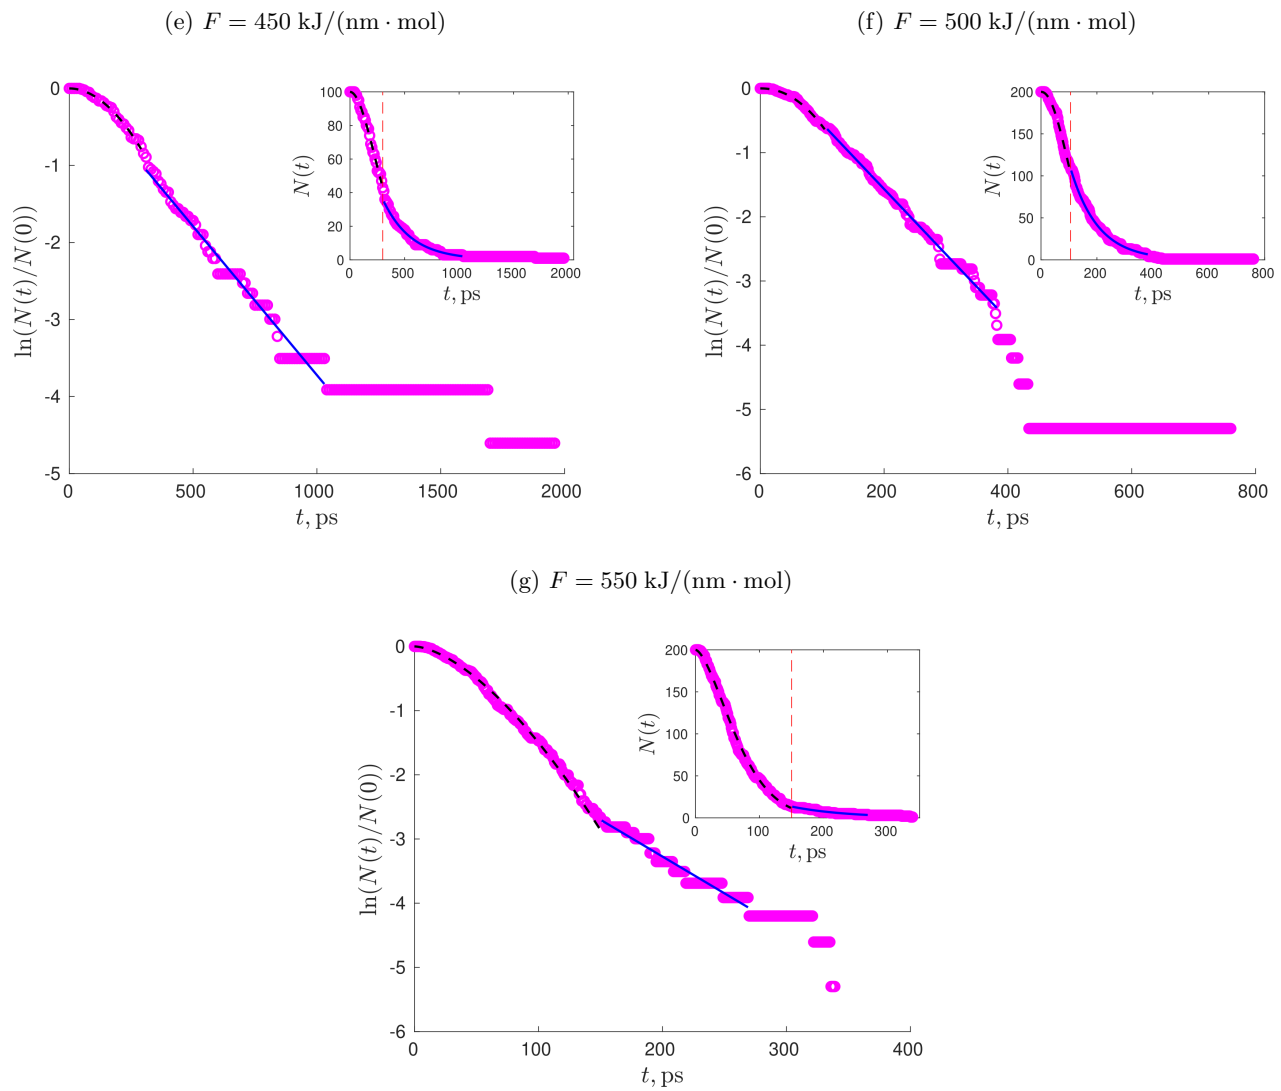

Figure S2. Fitting the survival probabilities of the protein-ligand complex with 2 regimes at different external forces: black dashed line – non-exponential regime, blue line – exponential regime, black dash-dot line – the moment of switching between the regimes. The “shelves” at large times were cut off according to the procedure shown in Fig. S1.

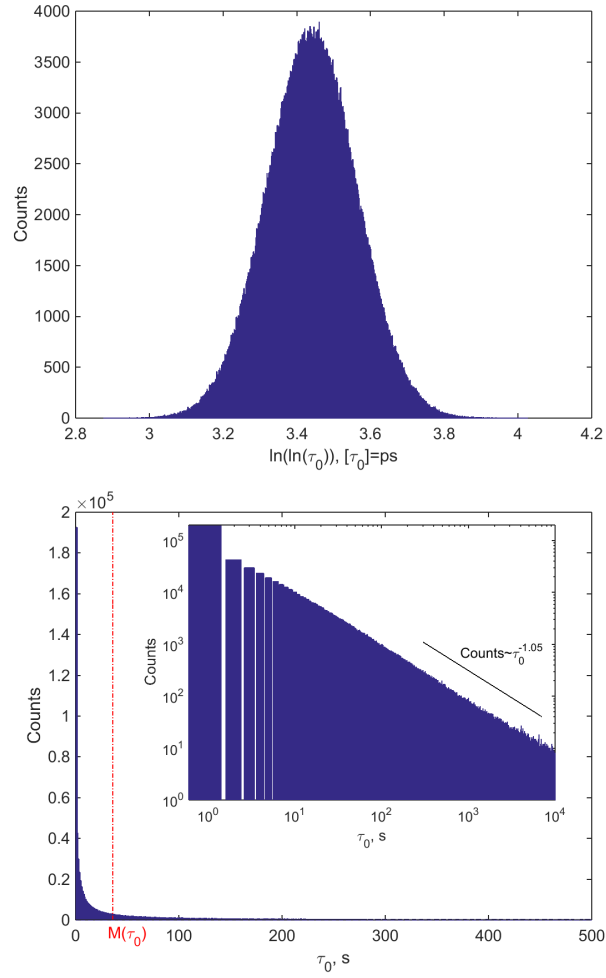

Figure S3. Monte-Carlo simulated distributions of the fitted parameter  $\ln(\ln(\tau_0))$  (top) and transformed  $\tau_0$  (the long tail at large values is cut off to show the statistically significant part).
